# Supplementary material for: Plasma amino acid profile associated with fatty liver disease and co-occurrence of metabolic risk factors
Source: PubMed Central journal article supplement (PMC5670226; doi:10.1038/s41598-017-14974-w), 2017-11-03
Supplement: 41598_2017_14974_MOESM1_ESM.pdf [file 41598_2017_14974_MOESM1_ESM.pdf]

**Title: Plasma amino acid profile associated with fatty liver disease and co-occurrence of metabolic risk factors**

Authors: Minoru Yamakado, Takayuki Tanaka, Kenji Nagao, Akira Imaizumi, Michiharu Komatsu, Takashi Daimon, Hiroshi Miyano, Mizuki Tani, Akiko Toda, Hiroshi Yamamoto, Katsuhisa Horimoto, Yuko Ishizaka

**Supplementary Table 1**

**Clinical characteristics of patients with nonalcoholic steatohepatitis (NASH)**

| N                                    | NASH<br>10  |
|--------------------------------------|-------------|
| (Male, Female)                       | (7, 3)      |
| Age (years)                          | 56.4±12.3   |
| Body weight (kg)                     | 66.1±12.3   |
| Body mass index (kg/m <sup>2</sup> ) | 26.6±4.3    |
| HDL-C (mg/dL)                        | 55.1±11.4   |
| LDL-C (mg/dL)                        | 142.2±40.5  |
| Triglyceride (mg/dL)                 | 142.5±54.8  |
| Total protein (g/dL)                 | 7.6±0.4     |
| T-CHO (mg/dL)                        | 219.6±39.7  |
| FPG (mg/dL)                          | 123.3±30.9  |
| HbA1c (%)                            | 6.2±0.9     |
| HOMA-IR                              | 4.3±3.1     |
| SBP (mmHg)                           | 125±14.6    |
| DBP (mmHg)                           | 75.3±8.7    |
| AST (U/I)                            | 66.3±40.0   |
| ALT (U/I)                            | 107.4±66.2  |
| LDH (U/I)                            | 233.7±48.9  |
| ALP (U/I)                            | 305.9±114.8 |
| γ-GTP (U/I)                          | 88.8±56.2   |
| Fischer's ratio                      | 3.4±0.7     |

Values are summarized as means ± standard deviations. HDL-C: high-density lipoprotein cholesterol, LDL-C: low-density lipoprotein cholesterol, T-CHO: total cholesterol, FPG: Fasting plasma glucose, HbA1c: hemoglobin A1C, HOMA-IR: homeostasis model assessment of insulin resistance, SBP: systolic blood pressure, DBP: diastolic blood pressure, AST: aspartate aminotransferase, ALT: alanine aminotransferase, LDH: lactate dehydrogenase, ALP: alkaline phosphatase, γ-GTP: gamma-glutamyl transpeptidase.

## Supplementary Table 2

**Odds ratios (ORs) with 95% confidence intervals (CIs) for association between fatty liver disease and fatty liver model (FLM) value in the training data (N=1,997)**

|                                                 | Unadjusted<br>OR (95%CI)       | Adjusted <sup>2</sup><br>OR (95%CI) | Adjusted <sup>3</sup><br>OR (95%CI) |
|-------------------------------------------------|--------------------------------|-------------------------------------|-------------------------------------|
| FLM value (transformed to z-score)              |                                |                                     |                                     |
| Per SD <sup>1</sup>                             | <b>4.88 (4.14 to 5.74)</b>     | <b>3.98 (3.28 to 4.83)</b>          | <b>2.30 (1.84 to 2.88)</b>          |
| P                                               | <b>&lt;0.001</b>               | <b>&lt;0.001</b>                    | <b>&lt;0.001</b>                    |
| FLM value (classified into the quintile groups) |                                |                                     |                                     |
| First group                                     | 1.00 (reference)               | 1.00 (reference)                    | 1.00 (reference)                    |
| Second group                                    | <b>3.92 (1.68 to 9.15)</b>     | <b>3.82 (1.61 to 9.07)</b>          | 2.36 (0.96 to 5.77)                 |
| Third group                                     | <b>9.55 (4.30 to 21.20)</b>    | <b>7.88 (3.44 to 18.07)</b>         | <b>3.81 (1.62 to 8.97)</b>          |
| Fourth group                                    | <b>25.11 (11.55 to 54.61)</b>  | <b>18.63 (8.18 to 42.41)</b>        | <b>6.24 (2.66 to 14.66)</b>         |
| Fifth group                                     | <b>91.37 (42.14 to 198.11)</b> | <b>53.62 (23.32 to 123.27)</b>      | <b>11.75 (4.86 to 28.37)</b>        |
| P for trend                                     | <b>&lt;0.001</b>               | <b>&lt;0.001</b>                    | <b>&lt;0.001</b>                    |

For calculating odds ratios, three individuals who have missing data (waist circumference data) were excluded from the analyses since adjustment cannot be done.

<sup>1</sup>Per SD: standard deviation for FLM value.

<sup>2</sup>Adjusted for age, sex, AST, ALT, LDH, ALP,  $\gamma$ -GTP, and Fischer's ratio.

<sup>3</sup>Adjusted for age, sex, AST, ALT, LDH, ALP,  $\gamma$ -GTP, Fischer's ratio, weight, BMI, waist circumference, HDL-C, LDL-C, TG, TP, T-CHO, FPG, HbA1c, HOMA-IR, SBP, and DBP.

Significant odds ratios are highlighted in bold type. P for trend was calculated by likelihood-ratio test.

AST: aspartate aminotransferase, ALT: alanine aminotransferase, LDH: lactate dehydrogenase, ALP: alkaline phosphatase,  $\gamma$ -GTP: gamma-glutamyl transpeptidase,

BMI: body mass index, HDL-C: high-density lipoprotein cholesterol, LDL-C: low-density lipoprotein cholesterol, TG: triglyceride, TP: total protein, T-CHO: total cholesterol, FPG: Fasting plasma glucose, HbA1c: hemoglobin A1C, HOMA-IR: homeostasis model assessment of insulin resistance, SBP: systolic blood pressure, DBP: diastolic blood pressure.
